# Supplementary material for: Acid rain formation through catalytic transformation of sulfur dioxide over clay dusts: remarkable promotion by a vicinal aluminium site
Source: Royal Society of Chemistry journal article supplement (doi:10.1039/d0cy02069a), 2021-01-01
Supplement: d0cy02069a1.pdf [file d0cy02069a1.pdf]

**Supplementary Information For:**

**Acid Rain Formation through Catalytic Transformation of  
Sulfur Dioxide over Clay Dusts: Remarkable Promotion by  
Vicinal Aluminium Site**

Gang Yang,\* Lijun Zhou

College of Resources and Environments & Chongqing Key Laboratory of Soil  
Multi-scale Interfacial Process, Southwest University, Chongqing 400715, China

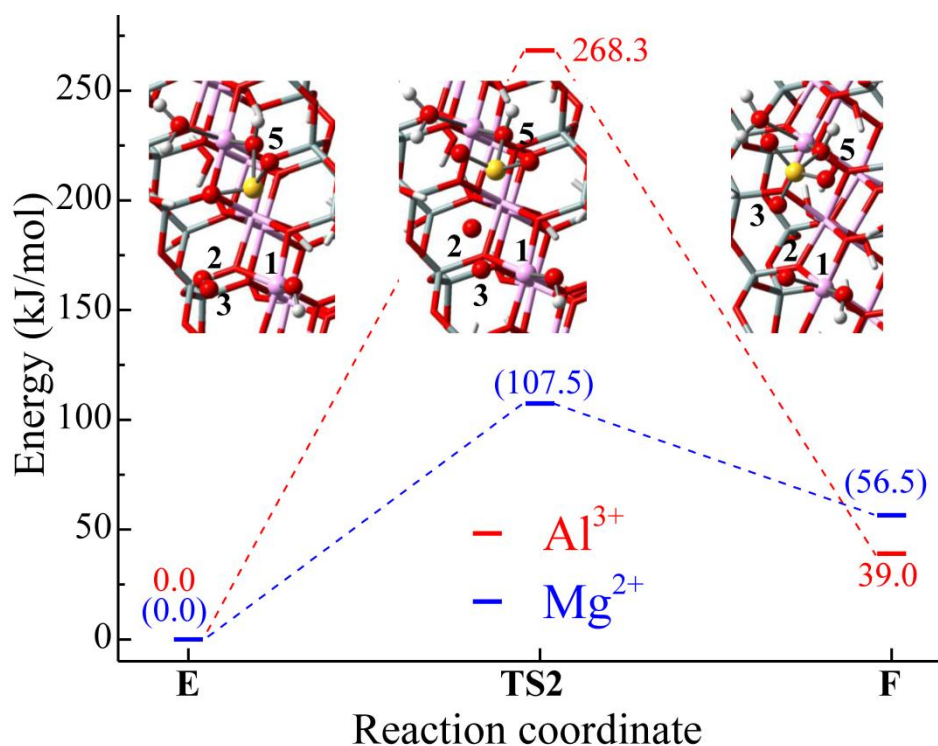

**Figure S1.** Potential energy diagrams for H<sub>2</sub>SO<sub>4</sub> production through SO<sub>2</sub> reaction with O<sub>2</sub>-adsorbed (010) edge of MMT (Path IV), where the reaction centers are Al<sup>3+</sup> or Mg<sup>2+</sup> site.

Local structures for reactions at Al<sup>3+</sup> site are shown. Color scheme: Si (cyan), Al (pink), O (red), S (orange) and H (white).

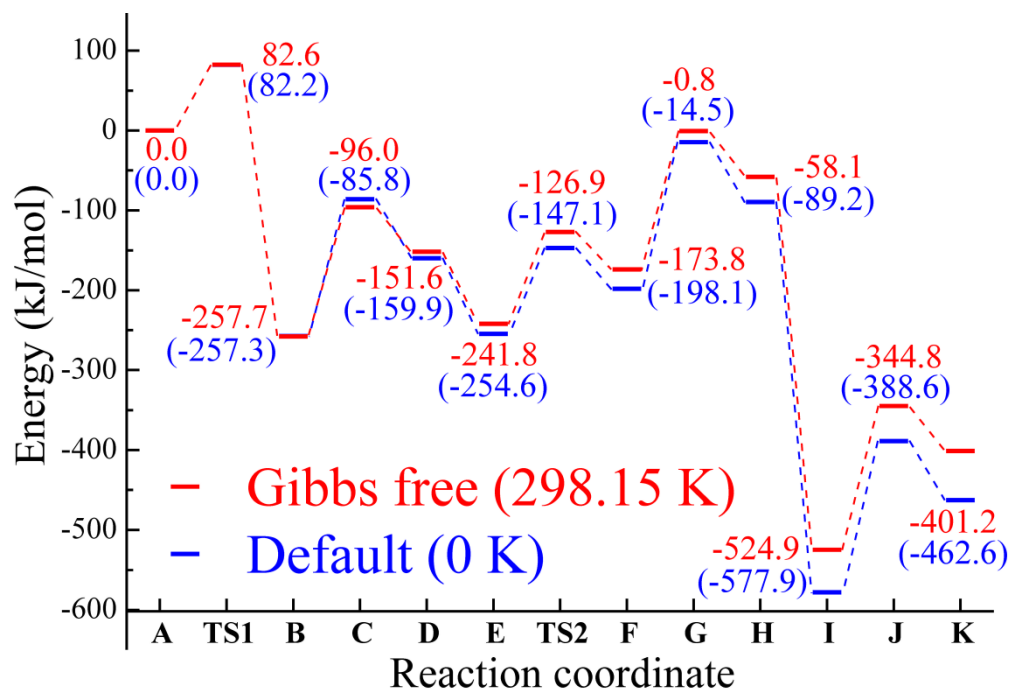

**Figure S2.** Profile of Gibbs free energy changes (298.15 K) for  $\text{H}_2\text{SO}_4$  production through direct reaction of  $\text{SO}_2$  and  $\text{H}_2\text{O}$  with  $\text{O}_3$  at (010) edge of MMT (Path III). Corresponding profile of internal energy changes (0 K) is depicted for comparison, and related structures are shown in Figure 5.
